# Supplementary material for: Water-dispersible fluorescent COFs disturb lysosomal autophagy to boost cascading enzymatic chemodynamic–starvation therapy
Source: Royal Society of Chemistry journal article supplement (doi:10.1039/d4tb01534g), 2024-01-01
Supplement: d4tb01534g1.pdf [file d4tb01534g1.pdf]

# 1 **Water-Dispersible Fluorescent COFs Disturb Lysosomal Autophagy to** 2 **Boost Cascading Enzymatic Chemodynamic-Starvation Therapy**

3 Hui Liu<sup>a</sup>, Wenxin Lv<sup>a</sup>, Darambazar Gantulga<sup>b</sup>, Yi Wang<sup>\*a</sup>

4 <sup>a</sup> Center for Advanced Low-dimension Materials, State Key Laboratory for Modification of Chemical Fibers and  
5 Polymer Materials, College of Chemistry and Chemical Engineering, Donghua University, Shanghai, 201600,  
6 China

7 <sup>b</sup> Department of Biology, School of Biomedicine, Mongolian National University of Medical Sciences, Zorig Street  
8 2, Peace Avenue, Sukhbaatar district, Ulaanbaatar 14210, Mongolia

9 \*Corresponding authors

10 Email: [ywang@dhu.edu.cn](mailto:ywang@dhu.edu.cn)

11

## 12 **1. Materials and methods**

### 13 *1.1 Materials*

14 3,5,3,5-tetramethylbenzidine (TMB), 1,3,5-tris(4-aminophenyl)benzene (TAPB) and 2,5-  
15 dimethoxyterephthalaldehyde (DMTP) were obtained from Leyan Regent Co., Ltd (China). 1-(3-  
16 dimethylaminopropyl)-3-ethylcarbodiimide hydrochloride was purchased from TCI Co., Ltd (Japan) Anhydrous  
17 acetonitrile, N-Hydroxysuccinimide and acetic acid were obtained from Aladdin Regent Co., Ltd. Ethanol,  
18 Polyethyleneimine (PEI-600), potassium iodide, ammonium molybdate, ethanol absolute, sodium hydroxide,  
19 iron(III) chloride hexahydrate, sodium citrate dehydrate, isopropyl alcohol, and hydrogen peroxide were sourced  
20 from Shanghai Titan Science Co., Ltd. (China). Glucose oxidase (GOx), Cy5-SE, Cell Counting Kit-8, 2,7-  
21 dichlorodihydrofluorescein diacetate (DCFH-DA), 4',6'-diamidino-2-phenylidole (DAPI), 2',7'-bis-(2-  
22 carboxyethyl)-5-(and-6)-carboxyfluorescein,acetoxymethyl ester (BCECF-AM), and JC-1 mitochondrial potential  
23 sensor were acquired from MeiLunbio Co., Ltd. Aminophenyl fluorescein (APF) was purchased from MKbio Co.,  
24 Ltd. Acridine Orange (AO) hydrochloride was obtained from MedChemExpress Co., Ltd. ATP assay kit  
25 (Colorimetric/Fluorometric) and Autophagy Staining Assay Kit were procured from Beyotimebio Co., Ltd. Cell  
26 culture medium 1640 and tyrisin were sourced from Gibco. PBS solution, Hank's, penicillin/streptomycin solution,

27 and L-glutamine were obtained from Hyclone. 4% sheep blood cells were acquired from Hongquan Biotechnology  
28 Co., Ltd.

### 29 1.2 Synthesis of $Fe_2O_3$

30 Firstly, 0.045 g  $FeCl_3 \cdot 6H_2O$  and 0.1 g  $Na_3C_6H_5O_7 \cdot 2H_2O$  were dissolved in 100 mL  $H_2O$ . Then, the pH of the  
31 solution was tuned to 5.8 with 0.1 M NaOH solution. After 0.024 g  $CO(NH_2)_2$  was added which then continuously  
32 stirred and refluxed at 100°C for 24 h. Then, the finished solution was then mixed with three times its volume of  
33 isopropanol for 5 h. The finished solution was centrifuged at 8000 rpm/min to isolate production after purification,  
34 which was then freeze-dried to obtain  $Fe_2O_3$ .

### 35 1.3 Synthesis of COF

36 Firstly, 3.55 mg DMTP and 3.4 mg TAPB were each dissolved in 950  $\mu$ L acetonitrile. After ultrasonic dissolution,  
37 the two solutions were mixed together. With continuous stirring, a 10 mL solution of acetic acid [5% ( $V_{acetic}$   
38  $acid/V_{water}$ )] was dropped into the system. After dropwise addition, stop stirring and leave the system standing for 72  
39 h at room temperature. Then, the precipitate was obtained at 11000 rpm/min and washed three times with alcohol  
40 and water. The resultant product was freeze-dried to obtain the COF. For the exploration of the optimal amount of  
41 acetic acid, the conditions mentioned above were kept constant, with only the concentration of acetic acid being  
42 varied [2.5%, 5%, 10%, 10%, 20%, ( $V_{acetic\ acid}/V_{water}$ )].

### 43 1.4 Synthesis of CF

44 Firstly, 10 mg COF and 10 mg PEI (Mw = 600) were respectively dispersed in 10 mL  $H_2O$  and stirred for 30 min.  
45 Then the finished system was centrifuged at 8000rpm/min and washed three times to obtain COF-PEI (CP). The 10  
46 mg CP and  $Fe_2O_3$  solution (1 mg/mL) were then re-dispersed and mixed in 20 mL deionized water and then  
47 sonicated for 10 min. Then, the precipitate was obtained at 8000 rpm/min and washed three times with alcohol and  
48 water which then was freeze-dried to obtain CF.

### 49 1.5 Synthesis of CG

50 Initially, 10 mg GOx, 6.3 mg EDC and 8.5 mg of NHS were mixed in 1 mL  $H_2O$  and stirred for 30 min at 37°C to  
51 yield activated GOx. The activated GOx was mixed with CP solution and stirred at 37°C for 8 h. Then, the finished  
52 solution was separated and precipitated, followed by three washes with water. The final product CG was obtained  
53 after freeze-drying.

### 54 1.6 Synthesis of CFG and CFGM

55 Firstly, 30 mg CF was dispersed in 60 mL deionized water with 10 mg activated GOx was mixing and stirring at  
56 37°C for 8 h. After the precipitate was washed three times with water and then freeze-dried to obtain CFG. To  
57 synthesize CFGM, 4T1 tumor cells were cultured in dishes until they reached confluence which then was digested  
58 with trypsin solution and washed thrice with PBS at 800 g for 5 min, and gathered. Then, subsequently dissolved in  
59 a low-osmotic lysis buffer containing Tris-HCl (20 mM), KCl (10 mM), MgCl<sub>2</sub> (2 mM), and a proteinase inhibitor,  
60 excluding EDTA. The cell suspension was sonicated in a cell disruptor for 15 min, sonicated at 10°C for 30 min,  
61 and the supernatant was obtained after 5 min of centrifugation which was then centrifuged for 30 min at 20000 g to  
62 yield purified cancer cell membrane (CM), where the protein concentrations were detected by BCA quantification  
63 test kit. The CM was re-suspended in 1x PBS and mixed with CFG which then filtered through a polycarbonate  
64 membrane with a 400 nm pore diameter. After centrifuging for 15 min at 11000 rpm, the precipitated CFGM was  
65 collected.

#### 66 *1.7 Characterizations*

67 UV-vis absorption spectra were analyzed with Cary300 UV-vis Spectrophotometer from Agilent Technologies. The  
68 Zetasizer Nano-ZS90 from Malvern was used for determining the size distribution and zeta potential. X-ray  
69 photoelectron spectroscopy (XPS) data was obtained with the Thermal Fisher ESCALAB 250Xi. Transmission  
70 electron microscopy (TEM) and energy-dispersive spectroscopy (EDS) were performed on a FEI Talos F200S,  
71 while scanning electron microscopy (SEM) was conducted on a Hitachi Regulus 8230. For TEM and SEM imaging,  
72 the samples were diluted in ethanol and dropped onto a copper grid and clean tin foil, respectively. FTIR spectra  
73 were captured using the ATR attachment method on TensorFlow II. A Lambda 950 Spectrophotometer from  
74 PerkinElmer was used for measuring UV-vis absorption spectra. The Crystallinity of the materials was examined  
75 by X-ray diffraction (XRD) analysis on a Bruker D8 ADVANCE diffractometer using Cu K $\alpha$  radiation.

#### 76 *1.8 Consumption of glucose*

77 The glucose consumption of CG and CFG in solution was assessed using the 3,5-dinitrosalicylic acid (DNS)  
78 colorimetric method as follow. DNS will be reduced into 3-amino-5-nitrosalicylsaeure by glucose with the  
79 decreased adsorption at 540 nm. CG and CFG solutions of varying concentrations (0, 50, 100, 200  $\mu$ g/mL) were  
80 added to 5 mM glucose solution for hydrolysis. At 0, 1, 3, 6, 12, and 24 h, 0.2 mL of each reaction system was  
81 mixed with 200  $\mu$ L DNS. After heating at 100°C for 5 min, the finished solution was diluted with 1 mL deionized  
82 water. Subsequently the absorbance of finished solution was determined at 540 nm.

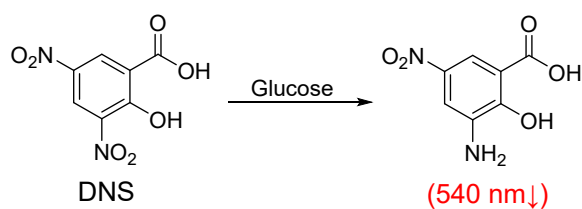

83

84 1.9  $H_2O_2$  Detection

85 The generation of  $H_2O_2$  was evaluated via iodometry, as  $H_2O_2$  can oxidize  $I^-$  to  $I_3^-$  with increased adsorption at 352  
 86 nm in the presence of ammonium molybdate. KI solution (2 M, 1 mL) and ammonium molybdate solution (10 mM,  
 87 50  $\mu$ L) were mixed to different concentrations CFG solution (0, 50, 100, 200  $\mu$ g/mL; 5 mM glucose solution) and  
 88 incubated for 30 min at 37°C. After centrifuging, the absorbance of the supernatant was determined at 352 nm.

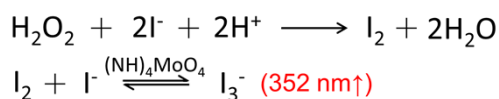

89

90 1.10 pH decrease

91 Different concentrations of CFG solution (0, 50, 100, 200  $\mu$ g/mL) were combined with various concentrations of  
 92 glucose solution (0, 5, 10, and 50 mM). The pH of the reaction system was recorded at 0, 0.5, 1, 3, 5, and 8 h. The  
 93 drop in pH indirectly demonstrated the glucose oxidase activity of the CFG.

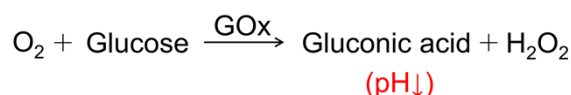

94

95 1.11 POD-like property detected by TMB

96 The generation of  $\cdot OH$  was assessed using 3,5,3,5-tetramethylbenzidine (TMB). Different concentrations of CF and  
 97 CFG solutions (0, 50, 100, 200  $\mu$ g/mL) were mixed with PBS (pH 5.0, pH 6.0, pH 7.4), TMB (0.5 mM), and  $H_2O_2$   
 98 (10 mM) and then incubated for 30 min at 37°C. In a similar manner, CFG (200  $\mu$ g/mL) solution was reacted with  
 99 5 mM glucose solution and TMB (0.5 mM) for 30 min at 37°C. After centrifuging, the absorbance of the  
 100 supernatant was determined at 652 nm.

101

102 1.12 CAT-like property

103 The alterations in dissolved oxygen were measured in CF solution (pH 7.4) containing  $H_2O_2$  (10 mM), CG solution  
 104 containing glucose (5 mM), and CFG containing glucose (5 mM), respectively. These measurements were taken at  
 105 37°C using a dissolved oxygen meter.

106 *1.13 Cell culture and animals*

107 4T1 tumor cells were acquired from the Shanghai Institute of Cell Biology, Chinese Academy of Sciences. The  
108 cells were cultivated in a 5% CO<sub>2</sub> environment at 37°C in RPMI-1640 medium containing 1%  
109 penicillin/streptomycin and 10% fetal bovine serum. 20-g Female Balb/c mice aged 6-8 weeks were maintained  
110 under specific pathogen-free conditions within the Department of Laboratory Animals. **All animal experiments**  
111 **complied with the guidelines evaluated and sanctioned by the Ethics Committee of Donghua University**  
112 **(Number: DHUEC-NSFC-2021-16).**

113 *1.14 Cellular uptake and localization*

114 4T1 cells ( $1 \times 10^5$  cells/well) were seeded into confocal dishes containing 400  $\mu$ L of culture medium and cultured  
115 overnight. Cell medium containing CFG and CFGM (500  $\mu$ L, 20  $\mu$ g/mL) was added and incubated for 2 and 4 h  
116 using a countdown method. After incubating, the cells were then treated with Hoechst33258 (200  $\mu$ L, 10  $\mu$ M) for  
117 15 min, and subsequently incubated for 20 min with LysoTracker Red DND-99 (200  $\mu$ L, 50 nM). After washing  
118 with PBS, Carl Zeiss LSM710 instrument was used for imaging the cells. The green channel, representing CFGM,  
119 was excited by 405 nm light and emitted at 515 nm. The red channel, representing LysoTracker Red DND-99, was  
120 excited by 561 nm light and emitted at 597 nm. The blue channel, representing Hoechst33258, was excited by 352  
121 nm light and emitted at 460 nm. Intracellular fluorescence values and lysosomal fluorescence values for CFG and  
122 CFGM were determined by flow cytometry.

123 *1.15 In vitro cytotoxicity assay*

124 To assess the cytotoxicity of each material, CCK-8 kit was acquired to determine cell viability. 4T1 cells ( $1 \times 10^4$   
125 cells/well) were seeded into a 96-well plate containing 200  $\mu$ L of culture medium and cultured for 24 h. With spent  
126 medium discarded, the cell medium containing COF, CF, CG, CFG, and CFGM (0, 10, 20, 40, 80, 100  $\mu$ g/mL  
127 respectively) was added and incubated 4 h. After replacing with fresh cell medium, the cells were cultured for an  
128 additional 20 h. After discarding the spent medium, CCK-8 solution (100  $\mu$ L, in a 1:10 ratio with the medium) was  
129 added and incubated for 1 h. BioTek instrument was used for determining the absorbance at 450 nm.

130 *1.16 Live-dead cells visualization*

131 Cell viability was determined by live/dead cell staining kit (Calcein-AM, PI). 4T1 cells ( $1 \times 10^4$  cells/well) were  
132 seeded into 96-well plate which containing 200  $\mu$ L of culture medium and cultured for 24 h. The spent medium was  
133 discarded, and the cell culture medium containing CFGM was added. After replacing with fresh cell medium, the

134 cells was cultured for an additional 20 h. Calcein-AM (2  $\mu$ M, 100  $\mu$ L) and PI (4  $\mu$ M, 100  $\mu$ L), both diluted in PBS,  
135 were added and incubated for 20 min, followed by two washes. Live cells (Calcein-AM at 515 nm, green) and dead  
136 cells (PI at 617 nm, red) were imaged with Carl Zeiss LSM710 instrument at 495 nm and 535 nm respectively. 4T1  
137 cells that received no treatment served as the control group.

#### 138 *1.17 Intracellular $\cdot$ OH, total ROS, $H_2O_2$ and pH detection*

139 4T1 cells ( $1 \times 10^6$  cells/well) were seeded into 6-well plate which containing 2 mL of culture medium and cultured  
140 for 24 h. The spent medium was discarded and replaced with COF, CF, CG, CFG, and CFGM (500  $\mu$ L, 20  $\mu$ g/mL)  
141 for a 4-h incubation period. Afterwards, the cells were then incubated with various probes, including DCFH-DA  
142 (total ROS probe), APF ( $\cdot$ OH probe), ROS Green<sup>TM</sup> ( $H_2O_2$  probe), and BCECF-AM (pH probe) staining 30 min to  
143 1 h. Finally, the cells were imaged with Carl Zeiss LSM710 instrument (DCFH-DA: Excitation at 488 nm,  
144 emission at 525 nm; APF: Excitation at 490 nm, emission at 515 nm; ROS Green<sup>TM</sup>: Excitation at 490 nm,  
145 emission at 525 nm; BCECF-AM: Excitation 488 nm, emission 535 nm).

#### 146 *1.18 Measurement of mitochondrial membrane potential*

147 JC-1 fluorescence probe was used for assessing mitochondrial membrane potential (MMP) changes. 4T1 cells ( $1 \times$   
148  $10^5$  cells/well) were seeded into confocal dishes containing 400  $\mu$ L of culture medium and cultured for 24 h. After  
149 replacing with cell culture medium containing COF, CF, CG, CFG, or CFGM (500  $\mu$ L, 20  $\mu$ g/mL), the cells were  
150 incubated for an additional 4 h. Then, after treating with JC-1 probe (200  $\mu$ L, 20  $\mu$ M), diluted in JC-1 and washing  
151 twice, the cells were imaged with Carl Zeiss LSM710 instrument. The red fluorescence signal images of JC-1  
152 aggregates were captured at 590 nm under 585 nm light excitation, and the green fluorescence signal images of JC-  
153 1 monomers were captured at 529 nm under 514 nm light excitation. 4T1 cells that received no treatment served as  
154 the control group.

#### 155 *1.19 Detection of lysosomal membrane permeabilization*

156 Lysosomal membrane permeability (LMP) was assessed using Acridine Orange (AO). 4T1 cells ( $1 \times 10^5$  cells/well)  
157 were seeded into confocal dishes containing 400  $\mu$ L of culture medium and cultured for 24 h. With Cell culture  
158 medium containing COF, CF, CG, CFG, or CFGM (20  $\mu$ g/mL, 500  $\mu$ L) replacing, the cells were incubated for an  
159 additional 4 h. Subsequently, the cells were treated with AO probe (200  $\mu$ L, 7.5  $\mu$ g/mL) diluted in PBS and then  
160 incubated for 20 min. Then, the cells were imaged with Carl Zeiss LSM710 instrument after washing twice with  
161 PBS. The green fluorescence signals of dsDNA collected at 530 nm and orange fluorescence signals of ssDNA and  
162 RNA collected at 640 nm, both under 488 nm light excitation. 4T1 cells that received no treatment served as the

163 control group.

#### 164 *1.20 Detection of autophagy*

165 The level of autophagy was assessed using the autophagy fluorescence probe, Monodansylcadaverine (MDC). 4T1  
166 cells ( $1 \times 10^5$  cells/well) were seeded into confocal dishes containing 400  $\mu\text{L}$  of culture medium and cultured for 24  
167 h. With cell culture medium containing COF, CF, CG, CFG, and CFGM (500  $\mu\text{L}$ , 20  $\mu\text{g}/\text{mL}$ ) replacing, the cells  
168 incubated for an additional 4 h. Subsequently, MDC probe (200  $\mu\text{L}$ , 1 $\times$ ) diluted in Assay Buffer (1 $\times$ ) was added  
169 and the cells were incubated for 20 min, repeated twice. The cells were imaged with Carl Zeiss LSM710 instrument  
170 (Ex 330 nm, Em 510 nm) after washing twice with cell culture medium,. 4T1 cells that received no treatment  
171 served as the control group. After subjecting to the same steps repeatedly, the protein lysate was collected for  
172 Western blotting to analyze the expression of LC3B in 4T1 cells treated with different nanomaterials.

173 4T1 cells ( $1 \times 10^5$  cells/well) were seeded into confocal dishes containing 400  $\mu\text{L}$  of culture medium and cultured  
174 for 24 h. With COF-containing cell culture medium (500  $\mu\text{L}$ , 20  $\mu\text{g}/\text{mL}$ ) at different pH (7.4, 6.5, and 5.0) replacing,  
175 the cells were incubated for an additional 4 h. With MDC probe diluted in Assay Buffer adding, the cells were  
176 incubated for 20 min. The cells were imaged with Carl Zeiss LSM710 instrument (Ex 335 nm, Em 512 nm) after  
177 washing twice with cell culture medium. 4T1 cells treated at different pH (7.4, 6.5, and 5.0) served as the control  
178 group.

#### 179 *1.21 Evaluation of ATP production*

180 Intracellular ATP content was determined via ATP detection kit. 4T1 cells were seeded into 100 mm petri dishes  
181 containing 200  $\mu\text{L}$  culture medium and cultured for 24 h. With cell culture medium containing COF, CF, CG, CFG,  
182 or CFGM (100  $\mu\text{L}$ , 20  $\mu\text{g}/\text{mL}$ ) replacing respectively, the cells were continuously incubated for an additional 24 h.  
183 Following the kit's instructions, ATP levels were measured. Luminescence was quantified using a luminometer.

#### 184 *1.22 Hemolytic ratios tests*

185 4% sheep blood cells (100  $\mu\text{L}$ ) was added to varying concentrations CFGM solutions at 0, 50, 100, 250, 500, and  
186 1000  $\mu\text{g}/\text{mL}$ , respectively and incubated at 37 $^\circ\text{C}$  for 2 h. The supernatants were collected after centrifuging at  
187 10000 rpm for 2 min. Absorbance was measured at 450 nm with BioTek instrument. For controls, 100  $\mu\text{L}$  4%  
188 sheep blood cells were mixed with either 900  $\mu\text{L}$  of PBS (negative control) or 900  $\mu\text{L}$  of deionized water (positive  
189 control). The provided formula: hemolysis rate (%) =  $[(D_t - D_{nc}) / (D_{pc} - D_{nc})] \times 100\%$  was used for calculating the  
190 hemolysis rate.

#### 191 *1.23 Construction of animal models for antitumor efficacy study*

192 An orthotopic breast cancer tumor model was established in 4T1 mice. CFG<sup>Cy5</sup> (80 μL, 1mg/mL) and CFG<sup>Cy5M</sup> (80  
193 μL, 1mg/mL) were injected through the tail vein when the tumor volume reached roughly 200 mm<sup>3</sup>. In vivo  
194 fluorescence was observed using an in vivo imaging system (IVIS Spectrum, Ex 650 nm, Em 670 nm) at 2, 4, 6, 12  
195 and 24 h after injecting.

196 The tumor-bearing mice were randomized into six groups (n=5): Control (80 μL, PBS), COF (80 μL, 1mg/mL), CF  
197 (80 μL, 1mg/mL), CG (80 μL, 1mg/mL), CFG (80 μL, 1mg/mL), and CFGM (80 μL, 1mg/mL) when the tumor  
198 volume reached roughly 100 mm<sup>3</sup>. Over 21-day period, the volume of the tumor and the body weight of the mice  
199 were recorded every other day. The formula:  $1/2 \times L \times W \times H$  was used for calculating tumor volume. Upon the  
200 tumor volume reaching roughly at 100 mm<sup>3</sup>, the mice were randomly divided into six groups (n=3) and treated with  
201 different materials over a 50-day period.

#### 202 *1.24 Statistical analysis*

203 One-way ANOVA using the Tukey post-test was used for calculating statistical significance (\*p < 0.05, \*\*p < 0.01,  
204 \*\*\* < 0.001, \*\*\*\*p < 0.0001).



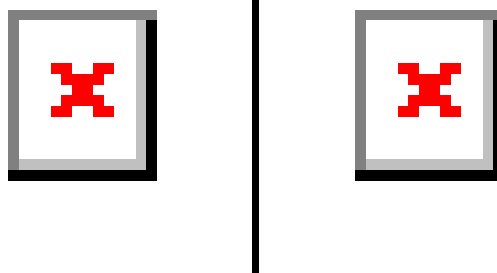

206

207 **Figure S1.** TEM images of  $\text{Fe}_2\text{O}_3$  nanoparticles. No clear lattice fringes were observed, indicating the quasi-  
208 amorphous structure of the  $\text{Fe}_2\text{O}_3$  nanoparticles.

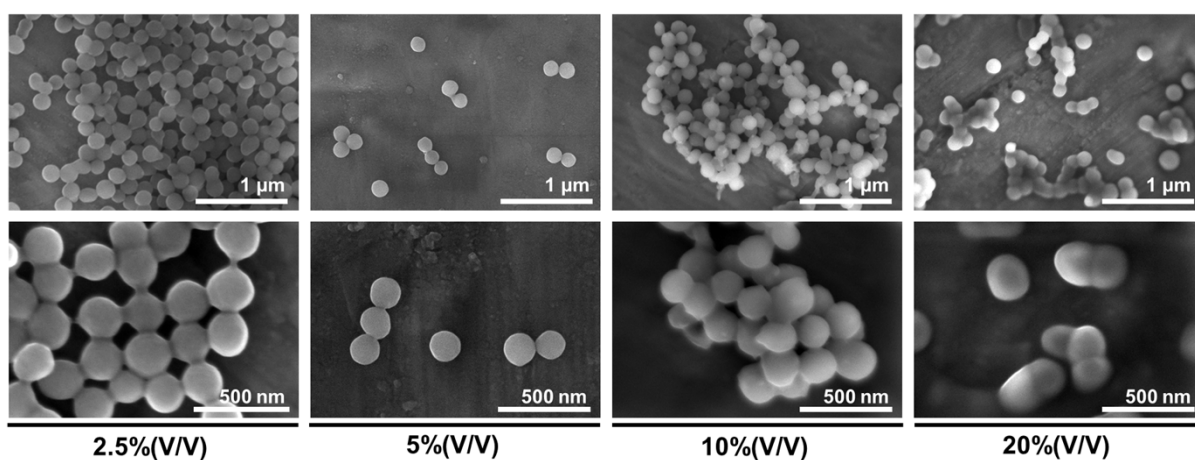

209

210 **Figure S2.** SEM images of COF synthesized under the acetic acid catalyst with different concentrations. At  
211 concentration of 5% (V/V), the as-synthesized COF possessed uniform morphology of nanospheres.

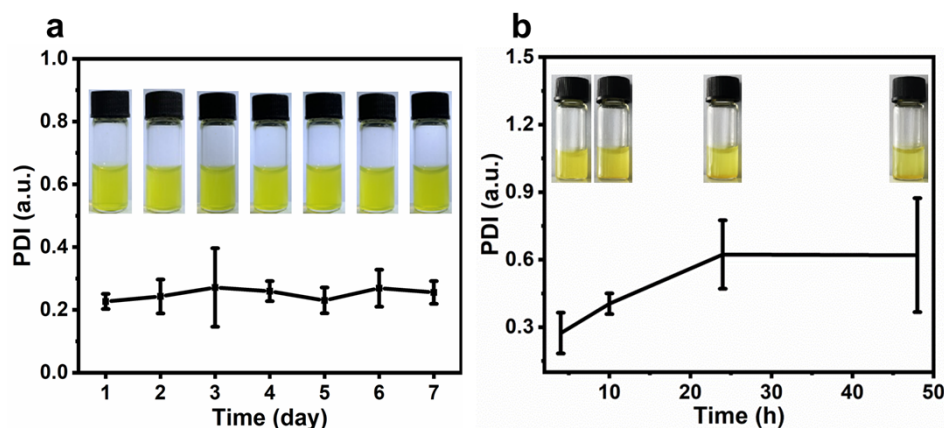

212

213 **Figure S3.** Polydisperse index of (a) COF in water for 7 days and (b) CFGM in water for 48 h. (inset: photos of  
214 COF in water for 7 days and CFGM in water for 48 h). COF was dispersed in water without sedimentation within 7  
215 days, indicating that it had advanced water dispersibility. After wrapping GOx and  $\text{Fe}_2\text{O}_3$ , although the water  
216 dispersibility decreased, it could still maintain no sedimentation for a long time (48 h).

217

218 **Figure S4.** FTIR spectra of different nanoparticles. The obvious C=N stretching vibration at 1618 cm<sup>-1</sup> for COF  
219 suggested its formation via Schiff base reaction between aldehyde group from DMTP and amino group from TAPB.

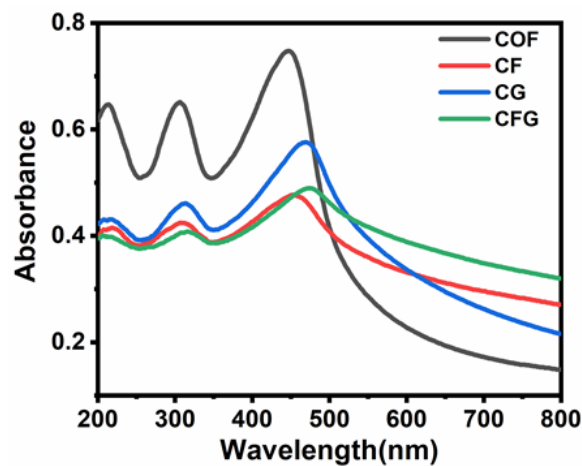

220

221 **Figure S5.** UV-vis spectra of different nanoparticles. After Fe<sub>2</sub>O<sub>3</sub> and GOx loading, the adsorption at 447 nm of  
222 COF had a gradual red-shift.

223

224 **Figure S6.** CLSM images of CFG and CFGM treated with DiO probe.

225

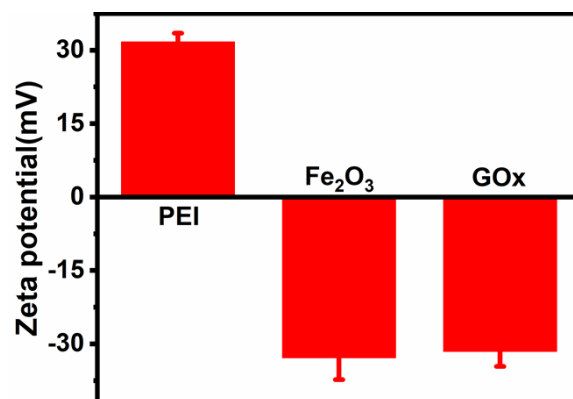

226

227 **Figure S7.** Zeta potentials of PEI, Fe<sub>2</sub>O<sub>3</sub> and GOx. Due to the adsorption of a layer of PEI on the COF surface,  
 228 GOx can be loaded through electrostatic interactions between the cationic PEI and the anionic GOx, as well as  
 229 through reactions between the PEI amino groups and the carboxyl groups activated on GOx.

230

231

232 **Figure S8.** Hydrodynamic diameters of different nanoparticles measured via DLS. Because of the hydration, the  
 233 particle sizes were a little larger than those observed by TEM images [1]. The gradually increased hydrodynamic  
 234 diameters from COF to CFG might be attributed to the Fe<sub>2</sub>O<sub>3</sub>/GOx loading and the enhanced hydration.

235

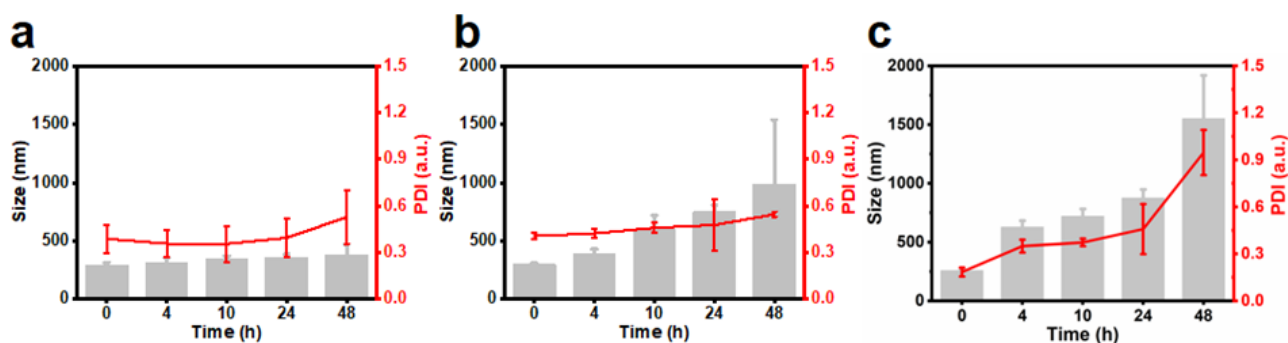

236

237 **Figure S9.** Hydrodynamic diameters and polymer dispersity index of CFG treated in (a) pH 7.4, (b) pH 6.0 and (c)  
 238 pH 5.0 solution for different time periods. Gradually increasing particle size and PDI suggested the nanoparticles  
 239 were gradually integrated together to form large congeries possibly due to the degradation fusion. CFG remains  
 240 stably dispersed at pH 7.4. At pH 6.0, there is a slight increase in PDI and particle size, suggesting possible  
 241 degradation and formation of aggregates. At pH 5.0, aggregation is even more pronounced.

242

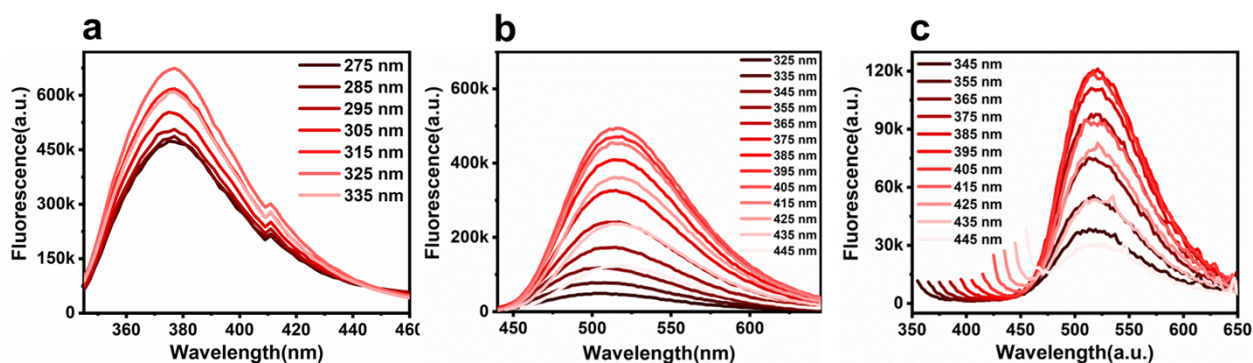

243

244 **Figure S10.** Fluorescence spectra of (a) TAPB, (b) DMTP and (c) COF excited at different excitation wavelengths.

245 The COF inherited the excitation-independent FL emissions from DMTP.

246

247 **Figure S11.** The remaining glucose concentrations in glucose solution (5 mM) (a) after reaction with varied  
 248 concentrations of CG for different time periods. (b) after reaction with CFG treated with pH 5.0 for different time  
 249 periods. The consumption rate of 5 mM glucose after 24 h of CFG degradation was found no significant reduced as  
 250 compared to the glucose consumption rate of undegraded CFG.

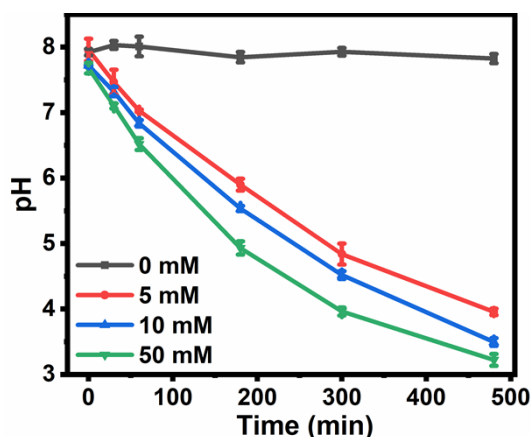

251

252 **Figure S12.** The pH values of the glucose solution with varied concentrations after reaction with CFG (200 µg/mL)  
 253 for different time periods.

254

255

256 **Figure S13.** (a-c) UV-vis spectra of the TMB-contained solution for probing ROS generation after reaction with  
 257 different concentrations of CF in the presence of H<sub>2</sub>O<sub>2</sub> under the varied pHs. (d) UV-vis spectra of TMB at 652 nm  
 258 for probing the  $\cdot$ OH generation in glucose solution (5 mM)-contained solution after reacting for 30 min with CFG  
 259 that was treated at pH 5.0 for different time periods. as compared to that of undegraded CFG, the  $\cdot$ OH generation  
 260 after CFG degradation had a slight reduction, possibly due to the dissolution of Fe<sub>2</sub>O<sub>3</sub> nanoparticles.



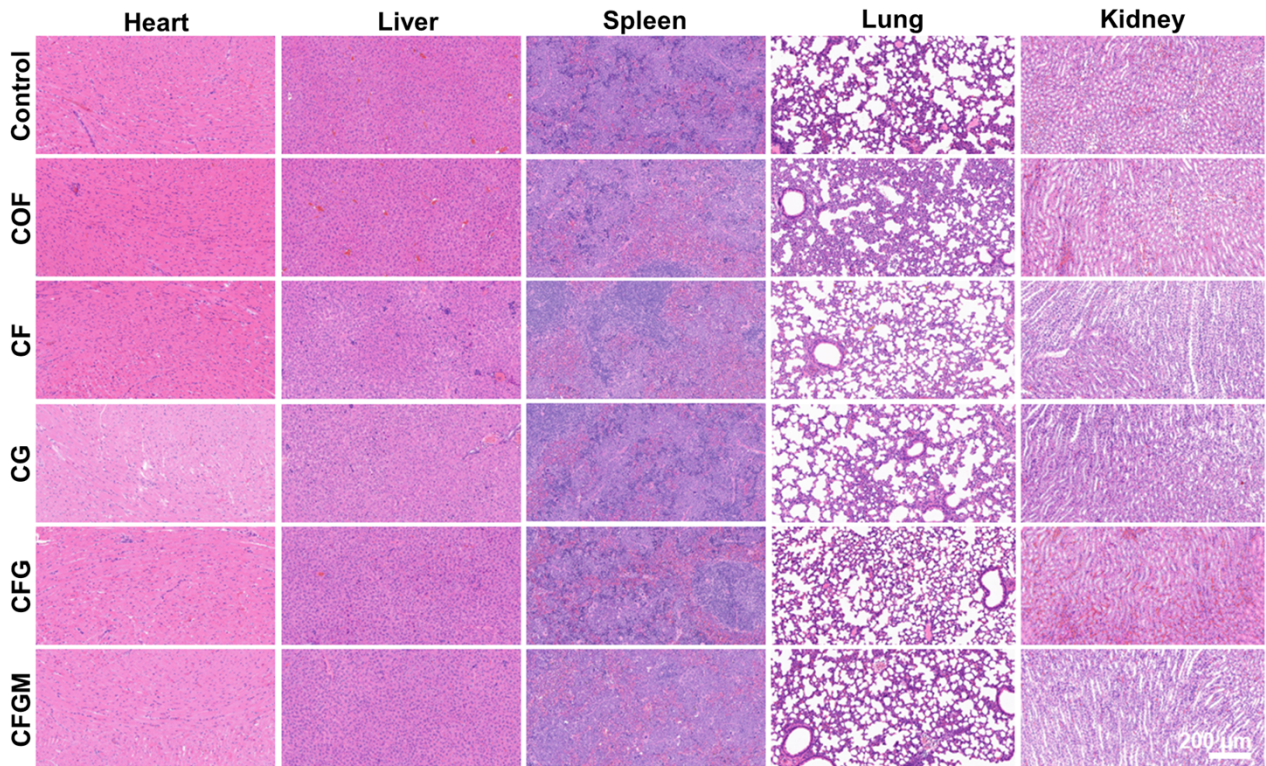

261

262 **Figure S14.** H&E images of heart, liver, spleen, lung and kidney tissues from the 4T1 tumor-bearing mice on the  
 263 21<sup>st</sup> day after various treatments.

264

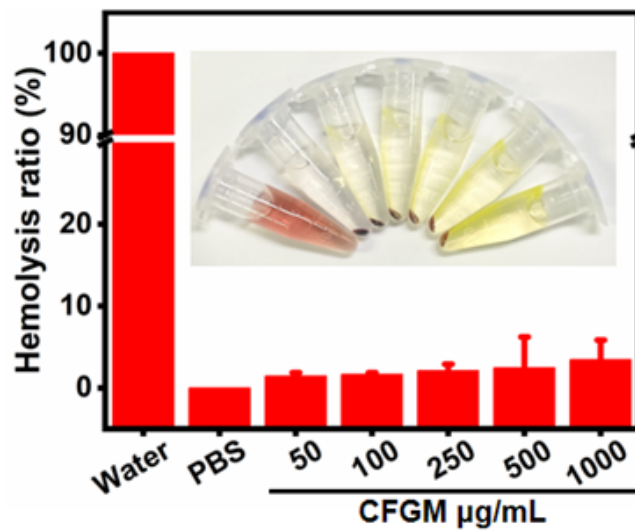

265

266 **Figure S15.** Hemolytic ratios of CFGM with different concentrations. The inset is the photos of supernatants.

267

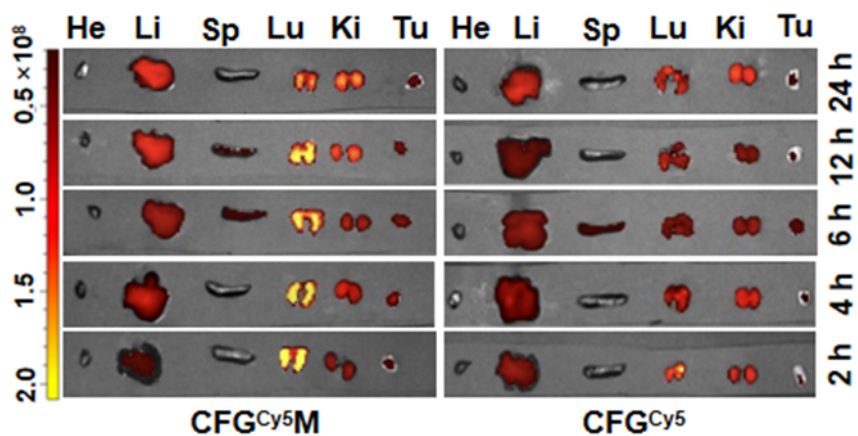

268

269 **Figure S16.** Ex vivo tissue fluorescence images of tumor-bearing mice after intravenous injection with CFG<sup>Cy5</sup> and  
 270 CFG<sup>Cy5</sup>M at different time points.

271

272

273 [1] S. Chen, J. Duan, X. Xie, Y. Fu, M. Zi, Adsorption enhances CH<sub>4</sub> transport-driven hydrate formation in size-varied  
 274 ZIF-8: Micro-mechanism for CH<sub>4</sub> storage by adsorption-hydration hybrid technology, Chem. Eng.J. 482 (2024) 148957.

275
